# Supplementary material
Source: Springer Nature journal article supplement (https://www.springermedizin.de/resource/supplementary/12943_2009_574_MOESM17_ESM.pdf/9555012)

**A**

Lung, Tumor  
 Histology: adenocarcinoma, papillary  
 Age: 59  
 Gender: Female  
 Tumor history: 1 M+  
 Tumor size (cm): 4x3.5x2.5  
 Differentiation: well  
 TNM: T2N0M0

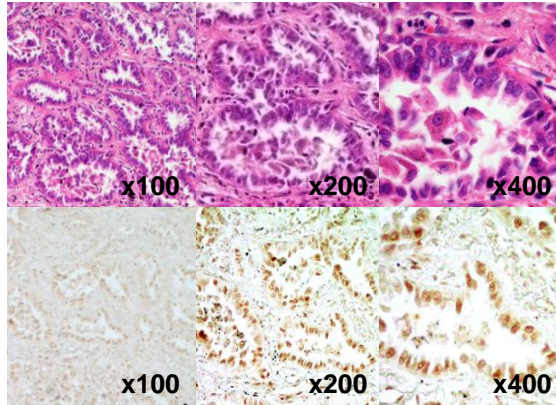**B**

Lung, Tumor  
 Histology: squamous cell carcinoma  
 Age: 70  
 Gender: Male  
 Tumor history: 1 M+  
 Tumor size (cm): diameter 3.2  
 Differentiation: poorly  
 TNM: T2N0M0

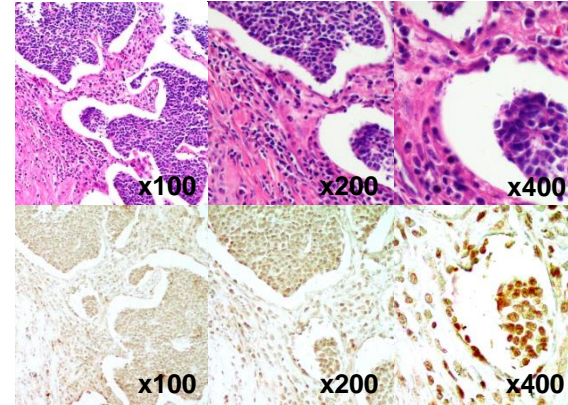**C**

Lung, Tumor  
 Histology: squamous cell carcinoma  
 Age: 65  
 Gender: Male  
 Tumor history: 2 M+  
 Tumor size (cm): 15x10x12  
 Differentiation: moderately  
 TNM: T2N0M0

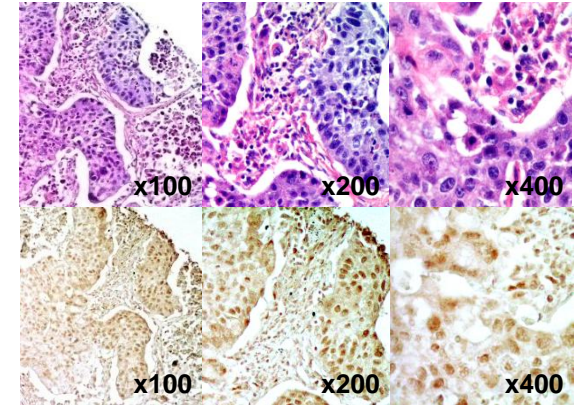**D**

Lung, Tumor  
 Histology: alveolus cell carcinoma  
 Age: 60  
 Gender: Female  
 Tumor history: 1 M  
 Tumor size (cm): 3x2.5x2  
 Differentiation: N/A  
 TNM: T2N0M0

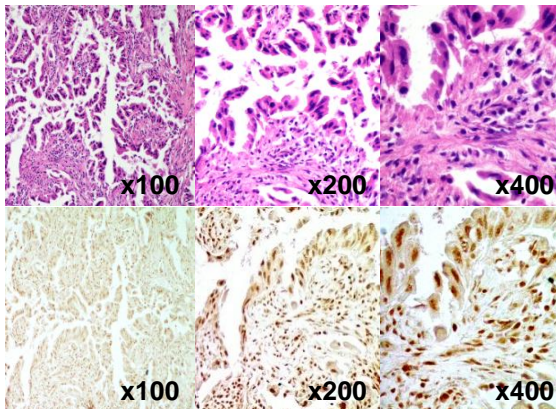**E**

Lung, Tumor  
 Histology: squamous cell carcinoma  
 Age: 69  
 Gender: Male  
 Tumor history: 40 D  
 Tumor size (cm): 5x4x4  
 Differentiation: poorly  
 TNM: T2N1M0

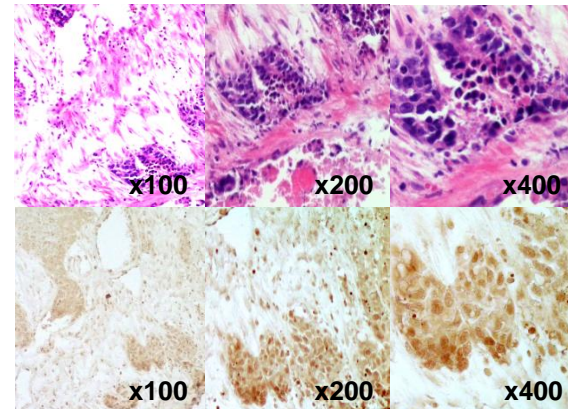**F**

Lung, Tumor  
 Histology: alveolus cell carcinoma  
 Age: 78  
 Gender: Male  
 Tumor history: 6 M+  
 Tumor size (cm): 1.5x0.5x0.3  
 Differentiation: moderately  
 TNM: T1N0M0

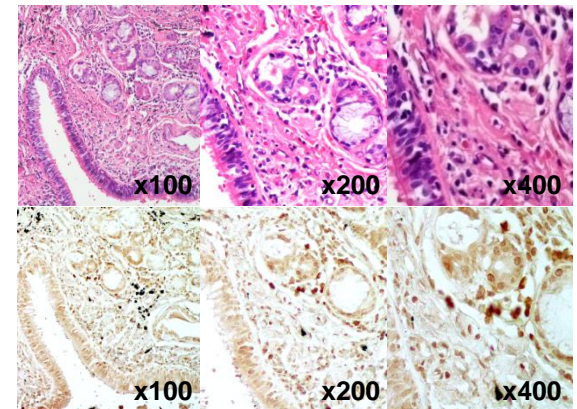

Supplement: MOESM17 [file 9555012]
